# Supplementary material for: Unexpected lower level of oral periodontal pathogens in patients with high numbers of systemic diseases
Source: PeerJ. 2023 Jul 14;11:e15502. doi: 10.7717/peerj.15502 (PMC10351517; doi:10.7717/peerj.15502)
Supplement: Supplemental Information 1 [file peerj-11-15502-s001.xlsx]

## Sheet: ListofDisease
Anemia				ADHD				Anemia
				Alzheimers				Asthma
				Anemia				Brain Tumors
				Anorexia				Breast Cancer
				appendicitis				Bronchitis
				Appendix removal				Congestive Heart Failure
				Arrythmia				CVD
				Arthritis				Depression
				Artial Flutter				Dermititis
				Asthma
				Autoimmune Disease				Epilepsy
				Barett's Esophagus				Esophageal Cancer
				Bell's Palsy				GERD
				Bladder Tumor				Graves Disease
				Bone Deformity				Hypertension
				Brain Tumors				Melanoma
				Breast Cancer				Neurodegernative Disease
				Breast Cyst				Neuropsychiatric Disorder
Asthma				Bronchitis				Osteopenia
Brain Tumors				Bulimia				Osteoperosis
Breast Cancer				Cardiovascular Disease				T2DM
Bronchitis				Cataracts				Unknown 5 Disease/Conditions
Congestive Heart Failure				Celiac Disease				Alzheimers
CVD				Cervical Cancer				Anemia
Depression				Cervical myedlodysplasia				Anorexia
Dermititis				Chronic Kidney Disease Stage 5				Appendix removal
Disease/Conditions of Known PD Associations (Review Paper Supported)				Collapsed Lung				Arrythmia
Epilepsy				Colon Cancer				Arythmia
Esophageal Cancer				Congestive Heart Failure				Asthma
GERD				COPD				Autoimmune Disease
Graves Disease				Craniochondrosarcoma				Barett's Esophagus
Hypertension				Crohn's Disease				Bell's Palsy
				Dementia				Bladder Tumor
				Depression				Bone Deformity
				Dermititis				Breast Cancer
				Diabetes				Breast Cyst
				Disease/Conditions of Known PD Associations (Review Paper Supported)				Bronchitis
				Diverticulitis				Bulimia
				Diverticulosis				Cataracts
				Eczema				Celiac Disease
				Emphysema				Cervical Cancer
				Epilepsy				Cervical myedlodysplasia
				Esophageal Cancer				Collapsed Lung
				Fibromyalgia				Colon Cancer
				Gastritis				COPD
				gastroparesis				Depression
				GERD				Dermititis
				Glaucoma				Diabetes
Melanoma				Gout				Diverticulitis
Neurodegernative Disease				Graves Disease				Diverticulosis
Neuropsychiatric Disorder				Hearing Loss				Eczema
				Heart Murmur				Emphysema
				Heart Palpitations				Epilepsy
				Heart Valve Disease				Fibromyalgia
				hematuria				Gastritis
				Hepatitis B				gastroparesis
				Hepatitis E				GERD
				High Cholesterol				Glaucoma
				HPV				Gout			Transient Ischemic Attack	Hypersensitivity Lung Disease
				Hypercholesterolemia				Hearing Loss
				Hypercholestrolemia				Heart Murmur
				Hyperlipidemia				Heart Palpitations
				Hypersensitivity Lung Disease				Heart Valve Disease
				Hypertension				hematuria
				Hyperthyroidism				Hepatitis B
				Hypocalcemia				High Cholesterol
				Hypothyroidism				HTN
				IBD				Hypercholesterolemia
				IBS				Hypercholestrolemia
				Idiopathic intracranial hypertension				Hyperlipidemia
				Idopathic Peripheral Neuropathy				Hypersensitivity Lung Disease
				ITP				Hypertension
				Kidney Disease				Hyperthyroidism
				Kidney Stones				Hypocalcemia
				Left-side Heart Valvular Issues				Hypothyroidism
Osteopenia				Leukemia				IBD
Osteoperosis				Melanoma				IBS
T2DM				Meniere disease				Idiopathic intracranial hypertension
				mitral valve prolapse				Idopathic Peripheral Neuropathy
				Mitral Valve Surgery				ITP
				MRONJ Risk				Kidney Disease
				Multiple Sclerosis				Kidney Stones
				Muscle Weakness				Left-side Heart Valvular Issues
				Neurodegernative Disease				Leukemia
				Neuropathy				Lupus
				Neuropsychiatric Disorder				mitral valve prolapse
				Obesity				MRONJ Risk
Unknown 5 Disease/Conditions				OSA				MS
Alzheimers				Osteoarthritis				Muscle Weakness
Anemia				Osteopenia				Neuropathy
Anemia				Osteoperosis				Neuropsychiatric Disorder
Anemia				Ovarian Cancer				Neuropsychiatric Disorders
Anemia				Ovarian Cyst				Obese
Anemia				Ovarian Tumor				Obesity
Anemia				Parasthesia				OSA
Anorexia				Peripheral Artery Disease				Osteopenia
Appendix removal				Peripheral Vascular Disease				Osteoperosis
Arrythmia				Peritonitis				Ovarian Cancer
				Pneumonia				Parahesias
				Polycystic Kidney Disease				Parasthesia
				Polycystic ovarian syndrome				Peripheral Artery Disease
				Pre-Cancerous Skin Lesions				Peripheral Vascular Disease
				Prostate Cancer				peritonitis
				Prostate Disorder				Pneumonia
				Psoriasis				Polycystic Kidney Disease
				PTSD				Polycystic ovarian syndrome
				Pulmonary HTN				Prostate Cancer
				Radiation/Chemo				Prostate Disorder
				Sciatica				Psoriasis
				Scoliosis				Pulmonary HTN
				Seizures				Radiation/Chemo
				Sinus issue				Scoliosis
				Sinusitis				Seizures
				Sjogren Syndrome				Sinus issue
				Sleep apnea				Sinusitis
				Spleen Aneurysm				Sjogren Syndrome
				STD				SLE
				Stroke				Sleep apnea
				Systemic Lupus Erythematosus				Spleen Aneurysm
				T1DM				STD
				T2DM				Stroke
				Testicular Infection				T1DM
				Thyroid Cancer				Testicular Infection
				Thyroid Disorder				Thyroid
				Thyroid Tumor				Thyroid Disorder
				Tinnitus				Thyroid Tumor
				Transient Ischemic Attack				Tinnitus
				Trivial Pulmonic Valve Regurgitation				Transient Ischemic Attack
				Tumors				Trivial Pulmonic Valve Regurgitation
				Vertigo				Tumors
								Type 2 Diabetes
Arythmia								Vertigo
Asthma								ADHD
								Anemia
								appendicitis
								Arthritis
								Artial Flutter
								Asthma
								Breast Cancer
								Bronchitis
Autoimmune Disease								Cataracts
Barett's Esophagus								Cervical cancer
Bell's Palsy								Chronic Kidney Disease Stage 5
Bladder Tumor								Craniochondrosarcoma
Bone Deformity								Crohn's Disease
Breast Cancer								Dementia
Breast Cancer								Depression
Breast Cyst								Diverticulitis
Bronchitis								Doesn't Work?
Bronchitis								Eczema
Bulimia								GERD
Cataracts								Glaucoma
Cataracts								Heart Murmur
cataracts								Hepatitis E
Celiac Disease								High Cholesterol
Cervical Cancer								HPV
Cervical Cancer								HTN
Cervical Cancer								Hyperlipidemia
Cervical myedlodysplasia								Hypertension
Collapsed Lung								Hyperthyroidism
Colon Cancer								IBS
COPD								Kidney Stones
Depression								Leukemia
Depression								Lupus
Depression								Meniere disease
Depression								Mitral Valve Surgery
Depression
Depression								Multiple Sclerosis
Depression								Obese
Depression								Osteoarthritis
Dermititis								Ovarian Cyst
Dermititis								Ovarian Cyst
Diabetes								Ovarian Tumor
Diverticulitis								Pre-Cancerous Skin Lesions
diverticulitis								PTSD
Diverticulosis								Sciatica
Eczema								Sinus issue
Emphysema								Sleep apnea
Emphysema								Stroke
Emphysema								T2DM
Emphysema								Thyroid Cancer
Epilepsy								Tinnitus
Epilepsy
Epilepsy
Fibromyalgia
Fibromyalgia
Fibromyalgia
Gastritis
gastroparesis
GERD
GERD
GERD
GERD
GERD
GERD
GERD
GERD
GERD
GERD
GERD
GERD
GERD
GERD
GERD
GERD
GERD
GERD
GERD
GERD
GERD
GERD
GERD
GERD
Glaucoma
Gout
Hearing Loss
Hearing Loss
Heart Murmur
Heart Murmur
Heart Palpitations
Heart Valve Disease
hematuria
Hepatitis B
High Cholesterol
High Cholesterol
High Cholesterol
High Cholesterol
High Cholesterol
High Cholesterol
HTN
Hypercholesterolemia
Hypercholesterolemia
Hypercholestrolemia
Hyperlipidemia
Hypersensitivity Lung Disease
Hypertension
Hyperthyroidism
Hypocalcemia
Hypothyroidism
Hypothyroidism
Hypothyroidism
IBD
IBS
IBS
Idiopathic intracranial hypertension
Idopathic Peripheral Neuropathy
ITP
Kidney Disease
Kidney Stones
Left-side Heart Valvular Issues
Leukemia
Lupus
mitral valve prolapse
MRONJ Risk
MS
Muscle Weakness
Neuropathy
Neuropathy
Neuropsychiatric Disorder
Neuropsychiatric Disorder
Neuropsychiatric Disorder
Neuropsychiatric Disorder
Neuropsychiatric Disorders
Neuropsychiatric Disorders
Obese
Obese
Obesity
Obesity
Obesity
OSA
Osteopenia
Osteoperosis
Osteoperosis
Osteoperosis
Osteoperosis
Osteoperosis
Osteoperosis
osteoperosis
Osteoperosis
Osteoperosis
Osteoperosis
Ovarian Cancer
Parahesias
Parasthesia
Peripheral Artery Disease
Peripheral Vascular Disease
peritonitis
Pneumonia
Polycystic Kidney Disease
Polycystic ovarian syndrome
Prostate Cancer
Prostate Disorder
Psoriasis
Psoriasis
Psoriasis
Psoriasis
Pulmonary HTN
Radiation/Chemo
Scoliosis
Seizures
Sinus issue
Sinus Issue
Sinus issue
Sinus issue
Sinusitis
Sjogren Syndrome
SLE
Sleep apnea
Sleep Apnea
Spleen Aneurysm
STD
STD
Stroke
Stroke
Stroke
Stroke
T1DM
Testicular Infection
Thyroid
Thyroid Disorder
Thyroid Disorder
Thyroid Disorder
Thyroid Disorder
Thyroid disorder
Thyroid Tumor
Tinnitus
Transient Ischemic Attack
Trivial Pulmonic Valve Regurgitation
Trivial Pulmonic Valve Regurgitation
Tumors
Type 2 Diabetes
Vertigo
ADHD
Anemia
Anemia
appendicitis
Arthritis
Arthritis
Arthritis
Arthritis
Arthritis
Artial Flutter
Asthma
Asthma
Asthma
Asthma
Asthma
Asthma
Asthma
Breast Cancer
Bronchitis
Cataracts
Cataracts
Cervical cancer
Chronic Kidney Disease Stage 5
Craniochondrosarcoma
Crohn's Disease
Dementia
Depression
Depression
Diverticulitis
Doesn't Work?
Eczema
Eczema
GERD
GERD
Glaucoma
Glaucoma
Heart Murmur
Hepatitis E
High Cholesterol
HPV
HTN
HTN
HTN
HTN
HTN
HTN
HTN
HTN
HTN
HTN
HTN
HTN
HTN
HTN
Hyperlipidemia
Hypertension
Hyperthyroidism
IBS
Kidney Stones
Leukemia
Lupus
Meniere disease
Mitral Valve Surgery
MS
Multiple Sclerosis
Obese
Obese
Osteoarthritis
Ovarian Cyst
Ovarian Cyst
Ovarian Tumor
Pre-Cancerous Skin Lesions
PTSD
Sciatica
Sinus issue
Sinus issue
Sleep apnea
Stroke
Stroke
Stroke
T2DM
Thyroid Cancer
Tinnitus

## Sheet: Supp Table 1
Supplemental Table 1 Total systemic diseases/conditions used to calculate the number of largely chronic diseases and conditions
Alzheimer’s Disease
Anemia
Anorexia
Appendicitis
Arrythmia
Arthritis
Atrial Flutter
Asthma
Attention Deficit Hyperactivity Disorder
Autoimmune Disease
Barrett's Esophagus
Bell's Palsy
Bone Deformity
Brain Tumors
Breast Cancer
Breast Cyst
Bronchitis
Bulimia
Cardiovascular Disease
Cataracts
Celiac Disease
Cervical Cancer
Cervical myelodysplasia
Chronic Kidney Disease Stage 5
Chronic Obstructive Pulmonary Disease
Colon Cancer
Congestive Heart Failure
Craniochondrosarcoma
Crohn's Disease
Dementia
Depression
Dermatitis
Diverticulitis
Diverticulosis
Eczema
Emphysema
Epilepsy
Esophageal Cancer
Fibromyalgia
Gastritis
Gastroesophageal Reflux Disease
Gastroparesis
Glaucoma
Gout
Graves Disease
Hearing Loss
Heart Murmur
Heart Palpitations
Heart Valve Disease
Hematuria
Hepatitis B Hepatitis E
HPV
Hypercholesterolemia
Hyperlipidemia
Hypersensitivity Lung Disease
Hypertension
Hyperthyroidism
Hypocalcemia
Hypothyroidism
Idiopathic Bowel Disease
Idiopathic intracranial hypertension
Idiopathic Peripheral Neuropathy
Immune Thrombocytopenia
Irritable Bowel Syndrome
Kidney Disease
Kidney Stones
Leukemia
Melanoma
Meniere disease
Multiple Sclerosis
Muscle Weakness
Neurodegenerative Disease
Neuropathy
Neuropsychiatric Disorder Obesity
Obstructive Sleep Apnea
Osteopenia
Osteoperosis
Ovarian Cancer
Ovarian Cyst
Parasthesia
Peripheral Artery Disease
Peripheral Vascular Disease
Peritonitis
Pneumonia
Polycystic Kidney Disease
Polycystic ovarian syndrome
Post Traumatic Stress Disease
Pre-Cancerous Skin Lesions
Prostate Cancer
Prostate Disorder
Psoriasis
Pulmonary hypertension
Radiation/Chemo
Sciatica
Scoliosis
Seizures
Sinus issue
Sinusitis
Sjogren's Syndrome
Sleep apnea
Spleen Aneurysm
Stroke
Systemic Lupus Erythematosus
T1DM
T2DM
Testicular Infection
Thyroid Cancer
Thyroid Disorder
Tinnitus
Transient Ischemic Attack
Vertigo
