# Supplementary material for: Unexpected lower level of oral periodontal pathogens in patients with high numbers of systemic diseases
Source: PeerJ. 2023 Jul 14;11:e15502. doi: 10.7717/peerj.15502 (PMC10351517; doi:10.7717/peerj.15502)
Supplement: Supplemental Information 2 [file peerj-11-15502-s002.xlsx]

## Sheet: Supplemental Table 2
Supplemental Table 2 Use of multivariable analysis to compare microbial abundance and periodontal disease stage among 201 subjects
	Taxa associated with peridontitis Stage1 all subjects (n = 201)2
	Adjusted for Caries, Gender, Age, Tobacco Use
	Taxonomy	Coef2	Std. Dev.	p-value	q-value
	Porphyromonas.s__gingivalis	1.1434	0.1953	0	0
	Tannerella.s__forsythia	0.6678	0.1204	0	0
	Campylobacter.s__rectus	0.8727	0.158	0	0
	f__Peptostreptococcaceae_.XI..G.5..s__.Eubacterium._saphenum	1.0699	0.1953	0	0
	f__Peptostreptococcaceae_.XI..G.6..s__.Eubacterium._nodatum	0.9318	0.1748	0	0
	Treponema.s__denticola	0.8754	0.1709	0	0
	Pseudoramibacter.s__alactolyticus	1.0045	0.1994	0	0
	Filifactor.s__alocis	0.711	0.1564	0	0.0004
	Fusobacterium.s__sp._HMT_203	0.9451	0.2106	0	0.0005
	Mogibacterium.s__timidum	0.5479	0.1226	0	0.0005
	g__Treponema.__	0.7388	0.1654	0	0.0005
	Porphyromonas.s__endodontalis	0.4969	0.1121	0	0.0005
	Treponema.s__socranskii	0.4679	0.1165	0.0001	0.0023
	g__Peptostreptococcaceae_.XI..G.4..__	0.6242	0.1624	0.0001	0.0042
	Fretibacterium.s__fastidiosum	0.5471	0.1469	0.0002	0.0063
	g__Mycoplasma.__	0.6463	0.1799	0.0003	0.0084
	Prevotella.s__dentalis	0.6231	0.1738	0.0003	0.0084
	Fretibacterium.s__sp._HMT_360	0.6396	0.1913	0.0008	0.017
	g__Selenomonas.__	0.4459	0.1347	0.0009	0.0182
	Prevotella.s__sp._HMT_317	0.5484	0.1679	0.0011	0.0209
	Alloprevotella.s__tannerae	0.3268	0.1042	0.0017	0.0288
	Fusobacterium.s__nucleatum_subsp._vincentii	0.3103	0.1034	0.0027	0.0402
	Dialister.s__pneumosintes	0.3421	0.1162	0.0032	0.0444
	Treponema.s__sp._HMT_237	0.59	0.2084	0.0046	0.0599
	g__Peptidiphaga.s__gingivicola	0.4943	0.1815	0.0065	0.0776
	1. Periodontal Disease Graded Stage I - IV according to Caton et a., 2018.
	2. Adjusted for Caries, Gender, Age, Tobacco Use
	3. Negative coefficient indicates taxa that decrease with high number of disease/conditions
	Caton JG, Armitage G, Berglundh T, Chapple ILC, Jepsen S, Kornman KS, Mealey BL, Papapanou PN, Sanz M, and Tonetti MS. 2018. A new classification scheme for periodontal and peri-implant diseases and conditions - Introduction and key changes from the 1999 classification. J Periodontol 89 Suppl 1:S1-s8. 10.1002/jper.18-0157
