# Supplementary material for: Unexpected lower level of oral periodontal pathogens in patients with high numbers of systemic diseases
Source: PeerJ. 2023 Jul 14;11:e15502. doi: 10.7717/peerj.15502 (PMC10351517; doi:10.7717/peerj.15502)
Supplement: Supplemental Information 3 [file peerj-11-15502-s003.xlsx]

## Sheet: Suuplmental Table 3
Supplemental Table 3 Demographics of the subset of 117 subjects with none to moderate periodontal disease
	Periodontal Disease None to Moderate
Variables	0 to 1 Diseases/Conditions1	2 to 3 Diseases/Conditions	Probability2	4+ Diseases/Conditions	Probability22
	(n = 52)	(n = 36)		(n = 29)
Age	35.2 ± 1.6	50.88 ± 2.3	p<0.001	64.55 ± 2.5	p<0.0001
Gender (F:M)	34F :18 M	27F:9M	p< 0.360	22F:7M	p< 0.452
Tobacco Users (Nonsmokers: Smokers)	48NS:4S	33NS:3S	p< 1.0	24NS:5S	p< 0.270
Caries	5.38 ± 1.4	1.11 ± 0.30	p<0.013	3.45 ± 1.0	p<0.33
Med Count	0.54 ± 0.14	3.00 ± 0.5	p<0.001	5.83± 0.86	p<0.001
1 ± values are shown with SEM
2 Differences versus the group with 0 to 1 conditions were determined using Student t test or Fisher Exact Test as appropriate.
