# Supplementary material for: Unexpected lower level of oral periodontal pathogens in patients with high numbers of systemic diseases
Source: PeerJ. 2023 Jul 14;11:e15502. doi: 10.7717/peerj.15502 (PMC10351517; doi:10.7717/peerj.15502)
Supplement: Supplemental Information 4 [file peerj-11-15502-s004.xlsx]

## Sheet: AbundanceWShenAdami
index	ID	k__Bacteria;p__Firmicutes;c__Bacilli;o__Lactobacillales;f__Streptococcaceae;g__Streptococcus;__	k__Bacteria;p__Bacteroidetes;c__Bacteroidia;o__Bacteroidales;f__Prevotellaceae;g__Prevotella;__	k__Bacteria;p__Bacteroidetes;c__Bacteroidia;o__Bacteroidales;f__Prevotellaceae;g__Prevotella;s__histicola	k__Bacteria;p__Firmicutes;c__Bacilli;o__Bacillales;f__Gemellaceae;g__Gemella;s__sanguinis	k__Bacteria;p__Firmicutes;c__Bacilli;o__Lactobacillales;f__Carnobacteriaceae;g__Granulicatella;s__adiacens	k__Bacteria;p__Proteobacteria;c__Betaproteobacteria;o__Neisseriales;f__Neisseriaceae;g__Neisseria;__	k__Bacteria;p__Actinobacteria;c__Actinobacteria;o__Actinomycetales;f__Actinomycetaceae;g__Schaalia;__	k__Bacteria;p__Firmicutes;c__Negativicutes;o__Veillonellales;f__Veillonellaceae;g__Veillonella;__	k__Bacteria;p__Fusobacteria;c__Fusobacteriia;o__Fusobacteriales;f__Fusobacteriaceae;g__Fusobacterium;__	k__Bacteria;p__Firmicutes;c__Bacilli;o__Lactobacillales;f__Streptococcaceae;g__Streptococcus;s__parasanguinis_clade_411	k__Bacteria;p__Bacteroidetes;c__Bacteroidia;o__Bacteroidales;f__Porphyromonadaceae;g__Porphyromonas;s__pasteri	k__Bacteria;p__Firmicutes;c__Bacilli;o__Lactobacillales;f__Streptococcaceae;g__Streptococcus;s__salivarius	k__Bacteria;p__Actinobacteria;c__Actinobacteria;o__Actinomycetales;f__Actinomycetaceae;g__Schaalia;s__sp._HMT_180	k__Bacteria;p__Actinobacteria;c__Actinobacteria;o__Actinomycetales;f__Micrococcaceae;g__Rothia;s__mucilaginosa	k__Bacteria;p__Bacteroidetes;c__Bacteroidia;o__Bacteroidales;f__Prevotellaceae;g__Alloprevotella;s__sp._HMT_308	k__Bacteria;p__Bacteroidetes;c__Bacteroidia;o__Bacteroidales;f__Prevotellaceae;g__Prevotella;s__sp._HMT_313	k__Bacteria;p__Fusobacteria;c__Fusobacteriia;o__Fusobacteriales;f__Leptotrichiaceae;g__Leptotrichia;s__wadei	k__Bacteria;p__Bacteroidetes;c__Bacteroidia;o__Bacteroidales;f__Prevotellaceae;g__Prevotella;s__pallens	k__Bacteria;p__Actinobacteria;c__Actinobacteria;o__Actinomycetales;f__Actinomycetaceae;g__Schaalia;s__lingnae_[Not_Validly_Published]	k__Bacteria;p__Firmicutes;c__Bacilli;o__Lactobacillales;f__Streptococcaceae;g__Streptococcus;s__infantis_clade_431	k__Bacteria;p__Firmicutes;c__Clostridia;o__Clostridiales;f__Peptostreptococcaceae_[XI];g__Mogibacterium;__	k__Bacteria;p__Actinobacteria;c__Actinobacteria;o__Actinomycetales;f__Actinomycetaceae;g__Actinomyces;s__graevenitzii	k__Bacteria;p__Fusobacteria;c__Fusobacteriia;o__Fusobacteriales;f__Leptotrichiaceae;g__Leptotrichia;s__sp._HMT_215	k__Bacteria;p__Proteobacteria;c__Betaproteobacteria;o__Burkholderiales;f__Burkholderiaceae;g__Lautropia;s__mirabilis	Unassigned;__;__;__;__;__;__	k__Bacteria;p__Firmicutes;c__Negativicutes;o__Veillonellales;f__Veillonellaceae;g__Veillonella;s__parvula	k__Bacteria;p__Bacteroidetes;c__Bacteroidia;o__Bacteroidales;f__Prevotellaceae;g__Prevotella;s__nanceiensis	k__Bacteria;p__Firmicutes;c__Negativicutes;o__Veillonellales;f__Veillonellaceae;g__Megasphaera;s__micronuciformis	k__Bacteria;p__Actinobacteria;c__Actinobacteria;o__Actinomycetales;f__Actinomycetaceae;g__Schaalia;s__sp._HMT_172	k__Bacteria;p__Actinobacteria;c__Coriobacteriia;o__Coriobacteriales;f__Coriobacteriaceae;g__Atopobium;s__parvulum	k__Bacteria;p__Bacteroidetes;c__Bacteroidia;o__Bacteroidales;f__Porphyromonadaceae;g__Porphyromonas;s__gingivalis	k__Bacteria;p__Fusobacteria;c__Fusobacteriia;o__Fusobacteriales;f__Fusobacteriaceae;g__Fusobacterium;s__nucleatum_subsp._animalis	k__Bacteria;p__Fusobacteria;c__Fusobacteriia;o__Fusobacteriales;f__Fusobacteriaceae;g__Fusobacterium;s__nucleatum_subsp._vincentii	k__Bacteria;p__Firmicutes;c__Bacilli;o__Lactobacillales;f__Streptococcaceae;g__Streptococcus;s__sp._HMT_064	k__Bacteria;p__Firmicutes;c__Bacilli;o__Lactobacillales;f__Streptococcaceae;g__Streptococcus;s__infantis_clade_638	k__Bacteria;p__Firmicutes;c__Bacilli;o__Lactobacillales;f__Streptococcaceae;g__Streptococcus;s__sp._HMT_074	k__Bacteria;p__Firmicutes;c__Bacilli;o__Lactobacillales;f__Streptococcaceae;g__Streptococcus;s__australis	k__Bacteria;p__Actinobacteria;c__Actinobacteria;o__Actinomycetales;f__Micrococcaceae;g__Rothia;s__aeria	k__Bacteria;p__Firmicutes;c__Bacilli;o__Bacillales;f__Gemellaceae;g__Gemella;__	k__Bacteria;p__Firmicutes;c__Bacilli;o__Lactobacillales;f__Streptococcaceae;g__Streptococcus;s__sp._HMT_066	k__Bacteria;p__Proteobacteria;c__Epsilonproteobacteria;o__Campylobacterales;f__Campylobacteraceae;g__Campylobacter;s__concisus	k__Bacteria;p__Firmicutes;c__Bacilli;o__Lactobacillales;f__Lactobacillaceae;g__Lactobacillus;__	k__Bacteria;p__Firmicutes;c__Clostridia;o__Clostridiales;f__Peptoniphilaceae;g__Parvimonas;s__micra	k__Bacteria;p__Saccharibacteria_(TM7);c__Saccharibacteria_(TM7)_[C-1];o__Saccharibacteria_(TM7)_[O-1];f__Saccharibacteria_(TM7)_[F-1];g__Saccharibacteria_(TM7)_[G-1];s__bacterium_HMT_352	k__Bacteria;p__Bacteroidetes;c__Bacteroidia;o__Bacteroidales;f__Porphyromonadaceae;g__Porphyromonas;__	k__Bacteria;p__Bacteroidetes;c__Bacteroidia;o__Bacteroidales;f__Prevotellaceae;g__Prevotella;s__salivae	k__Bacteria;p__Bacteroidetes;c__Bacteroidia;o__Bacteroidales;f__Prevotellaceae;g__Prevotella;s__sp._HMT_306	k__Bacteria;p__Bacteroidetes;c__Bacteroidia;o__Bacteroidales;f__Prevotellaceae;g__Prevotella;s__oris
Guy139-LCKG85	A001	4620	5924	135	793	1058	13	2361	4892	1038	4266	438	0	937	81	393	2094	51	988	848	102	874	1027	56	0	2180	249	14	872	759	1177	925	205	1018	177	61	19	0	0	77	44	225	0	233	173	121	451	181	185
Guy140-LCNK1	A002	6032	4823	235	1210	2049	6608	1684	2080	2256	564	2870	0	785	163	1392	319	735	1458	140	397	439	578	415	9	3351	18	266	34	1851	164	0	17	9	0	448	27	570	11	329	925	247	0	8	686	6	85	0	14
Guy141-LCNK7	A003	2666	1857	1174	3952	697	632	550	2568	1571	3621	553	0	375	41	453	314	89	1017	176	214	331	247	536	60	1690	110	244	133	0	143	0	186	663	33	1225	0	164	22	105	87	378	0	240	211	149	186	201	182
Guy144-LCKG52	A004	5796	4463	3794	4105	2100	2615	3248	4460	1282	3789	214	0	109	728	1277	121	126	159	665	326	54	179	127	213	2244	295	265	239	547	261	0	32	68	0	64	9	189	30	626	1544	599	0	7	0	5	133	0	32
Guy145-LCKG77	A005	5271	793	38	1669	2665	4290	1478	1871	415	746	2327	0	253	443	75	274	6	87	127	278	16	246	43	457	2638	377	65	24	55	32	262	30	206	183	443	700	205	623	659	962	46	0	64	30	577	35	9	12
Guy146-LCKG91	A006	2763	3715	3968	534	1045	0	1619	4112	269	3619	151	0	218	133	745	0	0	1305	612	36	993	1297	127	0	1234	108	42	708	1474	270	0	131	171	0	146	120	0	0	22	0	125	54	80	1045	22	561	0	49
Guy150-LCKG86	A007	3700	1586	2511	296	958	239	283	3149	843	1470	61	0	1815	54	1891	2643	757	1486	238	0	456	367	394	30	2403	289	0	1677	2747	1470	0	345	216	0	0	27	0	0	299	0	260	0	326	1176	225	1136	703	111
Guy151-LCNK2	A008	7682	1452	3462	150	554	406	1244	4806	150	4193	13	0	473	104	64	736	2398	241	90	204	95	2091	235	0	1485	310	0	436	1073	220	745	402	982	0	247	0	0	0	128	0	306	18	343	208	0	423	326	445
Guy152-LCNK8	A009	8357	1805	1139	2040	1841	10177	542	3020	1421	2599	2146	0	0	367	6	25	91	300	191	54	38	442	186	53	1969	44	100	14	3653	66	0	20	16	0	1893	354	1366	66	95	528	166	0	16	214	327	148	0	9
Guy155-LCKG53	A010	9384	4321	483	2832	2466	1645	2889	4066	2109	798	1747	0	64	385	791	85	1208	263	321	460	261	935	288	51	1532	185	994	64	296	148	0	334	190	101	1025	66	1603	14	134	583	171	0	102	65	1919	211	0	167
Guy157-LCKG92	A011	2810	2703	614	1038	1980	1705	1163	2985	2082	3412	1201	0	1856	111	388	366	567	753	281	306	135	413	183	109	2276	56	340	501	75	347	42	23	71	0	445	118	1381	22	131	111	153	0	45	420	676	246	532	21
Guy161-LCKG64	A012	8075	5404	422	1066	1360	944	2702	6694	1450	2411	381	0	1402	549	545	193	71	2362	335	214	749	1660	138	0	1688	219	180	492	407	613	2	18	28	0	1029	0	775	0	68	0	241	0	6	379	0	618	0	22
Guy162-LCKG87	A013	8569	348	10984	0	702	17	3357	6487	50	3439	0	0	18	126	77	1639	11	0	177	169	333	1685	0	0	1077	135	3	1371	551	1559	0	92	144	171	0	0	0	0	38	0	60	107	167	0	9	483	1269	66
Guy163-LCNK3	A014	7378	3454	1408	2150	2781	312	1500	3411	354	2485	2338	0	1149	187	591	200	0	513	808	223	353	64	65	14	1132	95	654	114	1453	410	0	50	31	82	423	36	399	39	372	458	391	0	46	146	1626	527	262	28
Guy167-LCKG55	A015	348	396	1730	593	856	52	1407	3144	230	6103	20	1097	106	92	39	1787	35	637	447	233	67	548	0	0	2106	287	13	649	1425	380	0	131	665	147	0	0	0	0	164	0	335	29	273	348	4	582	0	248
Guy168-LCKG81	A016	4211	538	12	333	1106	4710	126	324	417	41	1044	0	231	164	18	116	679	199	9	160	45	18	0	312	3173	190	23	9	21	10	5	207	179	0	166	0	402	640	1271	64	53	0	80	29	447	66	0	231
Guy169-LCKG93	A017	2426	6291	200	302	1620	7591	1926	4192	130	247	880	0	263	286	134	42	184	380	106	101	444	6	22	405	477	364	31	0	0	9	3	0	0	0	0	0	5670	0	28	1476	78	0	0	0	169	100	0	11
Guy172-LCKG57	A018	4197	5418	548	1773	2089	230	1943	3033	884	2422	1172	0	598	333	1295	88	70	877	744	92	263	428	347	95	977	38	292	402	59	362	0	81	220	93	595	164	18	34	257	0	320	0	93	104	185	176	69	41
Guy173-LCKG65	A019	10656	6461	250	1739	2978	7267	1419	3842	1553	2517	617	0	0	561	718	221	257	1499	305	135	81	275	92	35	1568	66	214	474	1782	298	29	39	15	0	965	439	749	192	118	86	547	0	0	920	279	782	187	13
Guy174-LCKG88	A020	2368	2330	219	2795	3390	6845	1364	2207	2284	1124	2644	0	1381	241	138	0	40	506	210	321	74	404	375	99	1731	11	1147	29	624	98	0	26	15	0	1328	1359	1330	68	274	508	67	6	12	646	2410	17	0	21
Guy175-LCNK4	A021	6470	2845	808	339	1834	7199	787	2931	795	2238	975	0	790	435	1360	1811	464	1381	305	301	167	419	189	148	2807	232	1261	134	0	193	0	186	119	104	288	120	247	606	305	0	403	5	32	426	293	649	356	255
Guy179-LCKG73	A022	4093	1301	10	282	482	2127	170	805	690	428	234	0	1347	115	59	0	93	359	35	193	83	261	108	209	4930	82	22	0	0	14	3151	158	252	0	342	505	54	70	133	44	74	0	151	94	93	46	0	44
Guy180-LCKG82	A023	6867	2998	930	1129	1298	608	1787	3749	665	1984	376	0	3199	244	1101	1145	1408	1023	773	231	300	1405	165	127	2158	122	34	506	1202	1000	2	11	8	113	1200	695	301	63	42	50	149	0	16	925	237	461	1634	0
Guy181-LCKG94	A024	6151	1146	1172	784	1821	2966	1391	2147	694	1267	1519	0	350	322	80	164	264	199	186	620	42	208	180	52	759	41	478	40	102	47	44	0	24	0	835	203	642	171	199	639	56	0	3	0	928	60	259	0
Guy184-LCKG58	A025	6909	1668	2417	36	1085	363	400	4196	132	3557	22	1433	154	101	95	818	494	180	94	25	75	597	68	46	1643	788	0	110	294	485	0	122	330	808	0	385	0	66	250	0	78	183	275	44	14	463	687	245
Guy185-LCKG67	A026	5290	1474	909	1475	1263	7025	411	2285	987	1813	1904	0	0	371	6	23	87	210	112	50	25	385	166	43	1475	34	84	10	2752	67	0	5	0	0	1210	231	924	47	41	285	109	0	13	151	293	74	0	11
Guy186-LCKG89	A027	5508	2730	1077	1245	1600	989	1041	2777	955	878	2127	0	2098	96	233	1350	1215	578	211	352	173	486	181	52	1019	84	545	252	839	294	0	123	73	0	828	0	432	24	22	678	214	0	32	225	680	258	135	121
Guy187-LCNK5	A028	4529	3855	576	1361	1287	2244	1892	4440	1235	2397	40	0	476	235	197	518	244	985	339	36	336	861	189	91	1052	92	126	239	675	163	0	56	107	0	284	58	145	0	110	590	287	0	143	29	51	315	156	126
Guy190-LCKG74	A029	2041	5061	199	23	34	6	698	2630	736	1530	1633	0	2241	102	228	150	1180	69	242	0	510	3738	1352	0	1694	83	327	0	3532	107	303	190	1695	0	0	0	0	92	117	33	1306	0	299	199	0	187	17	49
Guy191-LCKG84	A030	5495	1980	1124	1685	1509	16	248	3609	936	4389	835	0	33	178	0	1500	916	124	252	76	391	868	112	134	2065	135	24	303	2830	596	1269	263	614	0	1057	0	1271	0	37	0	156	0	375	59	304	154	0	101
Guy192-LCKG95	A031	6443	150	310	63	361	4	132	1978	6	2437	0	0	13	143	0	0	0	0	202	52	80	0	0	0	1372	2458	0	0	0	85	0	4389	18	93	0	0	0	0	44	0	314	126	162	0	0	39	0	2034
Guy195-LCKG59	A032	9806	1571	1145	1416	2078	266	2041	4249	44	2964	116	0	240	185	311	654	0	465	214	332	47	154	17	8	516	0	8	139	0	228	0	0	0	140	273	0	350	61	371	15	180	0	0	0	8	330	1333	11
Guy196-LCKG68	A033	5765	1135	4212	197	691	0	807	4999	0	3456	7	1053	14	239	0	0	943	0	532	52	129	6431	0	0	1014	51	0	223	0	276	0	219	217	268	147	0	171	0	8	0	269	0	86	0	0	286	0	213
Guy197-LCKG90	A034	4721	3128	950	425	2502	3926	1255	2765	423	2624	197	0	235	265	868	444	418	590	191	187	69	189	39	359	4073	403	338	102	0	49	3515	326	1026	0	975	0	130	65	481	50	89	5	169	45	0	160	140	163
Guy198-LCNK6	A035	5885	958	3607	13	549	101	950	5557	276	4287	146	0	387	198	35	2036	1349	0	230	0	80	264	0	94	557	1409	4	680	1209	71	0	580	1278	0	0	12	0	26	29	719	262	0	477	16	0	223	17	601
Guy201-LCKG76	A036	7002	212	2943	331	367	310	60	4185	286	1788	201	0	157	35	263	2756	1705	285	123	171	278	7180	194	91	1908	301	44	564	778	431	184	67	138	0	161	83	24	61	101	87	118	0	43	0	30	287	38	126
Guy202-LCKG88	A037	4076	235	8	241	1126	3337	457	388	400	81	610	0	108	158	123	329	22	73	30	128	14	6	0	401	2917	29	70	4	0	10	8101	73	3996	0	788	0	1874	269	30	64	44	0	330	134	143	16	0	149
Guy204-LCNK9	A038	5361	6520	1340	1202	4809	8007	5078	2599	125	2514	949	0	1589	885	27	0	0	506	783	0	145	0	0	0	421	83	0	108	0	62	3	121	349	0	3875	283	607	0	644	2730	180	16	159	0	25	356	0	192
Guy205-LCNK15	A039	8590	7479	181	2336	1785	166	2251	3724	3059	1260	3342	0	2837	483	663	0	234	829	386	727	178	658	177	69	1787	51	502	13	0	74	14	34	96	79	1294	323	1335	16	632	1091	376	0	15	351	0	33	9	33
Guy206-LCNK21	A040	3168	1801	1619	10	2629	6313	1421	1386	312	2039	528	0	0	252	25	0	269	0	211	210	28	145	43	132	356	78	102	0	430	25	1495	143	100	167	52	1714	37	42	516	19	291	0	109	0	169	295	0	135
Guy211-LCNK28	A041	4214	3464	0	2074	1030	5846	1158	2405	1499	2539	0	0	941	228	191	257	132	835	409	131	260	72	185	952	2770	207	449	130	738	105	0	170	534	0	1896	0	90	172	871	0	115	8	511	68	2315	167	23	174
Guy214-LCNK10	A042	2441	375	0	2434	748	7437	467	2110	4020	13	3355	0	2217	81	0	0	132	0	34	67	9	542	1548	86	1320	22	317	0	0	4	0	11	0	66	1537	213	2954	7	109	957	50	0	4	309	2403	9	30	0
Guy215-LCNK16	A043	8468	2455	225	1298	1175	6	2715	7292	853	4392	1226	0	1270	297	495	1503	89	1412	523	633	227	1021	153	42	440	324	466	363	813	502	0	15	0	97	518	0	0	87	280	3343	246	8	8	309	0	674	5	18
Guy216-LCNK22	A044	6672	3233	5047	568	881	168	1737	4735	517	3640	646	0	791	99	140	349	175	80	295	107	487	767	66	61	1089	260	40	495	248	381	273	165	111	38	0	101	0	27	216	0	321	0	126	90	189	319	994	105
Guy221-LCNK29	A045	7773	1808	1525	2083	1298	3364	251	2966	1036	2610	590	0	2663	131	447	2427	1252	906	163	508	227	540	288	104	785	95	98	431	1597	294	47	236	99	90	348	295	631	56	242	193	257	3	111	568	158	334	352	77
Guy224-LCNK11	A046	2200	730	500	588	928	10	1108	1925	299	3232	0	147	444	183	10	520	1545	8	198	201	114	2371	84	0	1285	960	3	303	0	207	2734	292	1059	0	195	0	0	0	76	0	176	0	598	124	0	79	7	339
Guy225-LCNK17	A047	3482	13	6	1436	1791	6610	1019	2334	2473	250	2557	0	394	136	607	0	0	0	168	278	161	978	171	140	1557	0	988	56	2179	31	0	0	0	0	117	0	2495	143	653	653	14	0	23	53	0	0	0	22
Guy226-LCNK23	A048	6532	927	0	555	759	192	100	2515	905	1533	473	0	35	93	510	3516	355	1491	228	0	854	711	399	451	1511	532	0	652	3080	544	0	156	83	0	32	15	44	0	112	0	213	0	54	1171	33	771	1729	62
Guy231-LCNK30	A049	4256	1466	211	1447	2282	3210	1064	1838	710	1614	1041	0	196	386	72	59	216	184	260	314	36	193	444	263	1801	30	246	16	50	30	1552	150	1294	0	1311	791	0	105	801	357	158	0	201	21	361	43	126	175
Guy234-LCNK12	A050	4068	1509	1715	1427	926	987	1724	4012	956	2032	520	0	0	76	620	2718	60	981	290	212	469	1499	359	65	537	27	257	745	1776	643	0	46	54	24	395	0	871	24	14	116	732	3	41	896	50	474	317	10
Guy235-LCNK18	A051	13145	5709	1447	1105	1157	966	1272	5959	935	3310	845	0	102	92	59	290	99	565	397	29	614	1528	296	254	1415	377	9	373	752	506	0	421	18	0	0	262	0	26	56	0	311	0	59	63	35	509	71	92
Guy236-LCNK24	A052	2180	1739	45	3162	2204	5785	2157	2052	2323	1064	4850	0	160	107	0	14	0	426	127	165	24	211	298	592	2433	71	251	34	0	14	0	131	376	0	207	0	344	567	113	0	40	0	31	40	1438	13	0	43
Guy240-LCJSA1	A053	7227	7521	835	2076	1366	1204	1054	5853	853	4106	521	0	68	368	499	1694	214	442	723	128	396	1489	14	44	1383	443	0	229	0	687	0	206	257	0	371	0	0	0	86	213	305	10	448	29	402	366	25	214
Guy241-LCNK31	A054	4646	4587	797	908	2507	1334	719	3941	399	2097	594	20	157	355	510	2190	398	601	320	641	256	97	85	0	1827	182	13	307	276	170	0	158	107	94	259	258	0	0	481	0	198	56	116	84	195	271	558	235
Guy244-LCNK13	A055	4166	1552	464	538	916	4687	209	1713	995	420	700	0	397	239	58	95	789	440	46	0	58	58	39	1700	1886	961	71	65	411	49	0	210	117	0	0	10	230	218	144	39	136	0	33	0	716	81	94	59
Guy245-LCNK19	A056	4273	1092	1772	556	1101	378	1139	3151	180	2289	396	0	1073	615	18	4176	309	910	313	236	164	542	0	395	1299	362	86	275	35	238	3	173	268	199	79	117	0	43	239	0	228	3	203	125	18	553	161	58
Guy246-LCNK25	A057	6519	732	13	1695	2806	742	247	515	482	2329	1073	0	0	822	0	0	0	0	237	0	55	0	0	8	2883	337	6	0	0	27	44	111	685	0	485	45	486	0	64	0	82	0	325	0	301	8	0	949
Guy250-LCJSA2	A058	5023	928	229	1350	2102	1033	1152	1748	1114	918	2366	0	280	478	88	290	578	462	169	309	52	175	291	127	1852	200	345	23	53	45	0	70	149	0	633	78	458	82	1104	120	125	0	58	61	623	286	71	58
Guy251-LCNK32	A059	4532	3931	1833	500	859	800	593	2661	362	2604	263	0	761	352	46	234	301	259	224	472	296	766	40	62	1769	100	48	98	0	319	81	354	149	0	187	64	46	42	120	139	383	6	95	96	252	459	0	190
Guy254-LCNK14	A060	5837	7105	1927	286	1443	8	1450	4574	39	6799	0	0	0	845	0	0	727	0	262	0	145	0	242	0	1902	18	0	190	0	810	0	0	0	0	0	48	0	0	0	0	1230	0	0	0	0	240	0	0
Guy255-LCNK20	A061	4124	5456	51	2151	491	3302	229	2175	1834	452	2089	0	1053	62	791	0	561	237	18	53	163	155	152	102	1108	42	143	290	0	129	0	44	24	0	829	0	1107	325	10	0	215	0	0	176	343	137	43	19
Guy256-LCNK26	A062	3907	1911	1872	655	1673	19	312	2772	175	1761	572	0	345	200	30	24	168	0	248	0	112	990	32	1410	1722	886	0	76	0	253	0	684	0	0	182	268	0	201	10	0	144	0	33	0	0	221	0	457
Guy260-LCNK27	A063	7411	2684	703	1525	1396	5013	702	2579	1101	781	3511	0	400	282	242	222	113	266	46	433	14	50	139	248	825	106	374	6	0	34	57	61	89	0	437	26	72	192	85	519	87	0	14	0	575	46	54	63
Rahe097-JSA9	A064	2725	1043	34	790	2772	5035	537	1284	1437	673	1548	0	576	225	46	23	165	70	107	0	61	158	34	465	1927	118	44	27	0	9	0	110	367	0	582	149	976	306	29	278	90	0	198	31	655	30	20	40
Rahe098-JSA10	A065	3770	2521	77	1739	2043	2511	750	2055	979	3066	1740	0	0	943	180	144	339	200	160	410	16	215	24	1436	312	0	239	26	848	18	0	7	41	0	1785	0	62	339	483	0	58	0	23	74	586	154	0	12
Rahe099-JSA11	A066	4320	3228	60	1460	755	2236	613	2288	2064	414	2406	0	263	98	260	436	671	318	35	524	78	18	107	95	1309	103	604	63	0	42	40	84	14	0	1080	16	741	150	254	136	176	0	9	24	1809	123	32	65
Rahe100-JSA12	A067	5920	2900	646	920	1288	1515	738	3062	828	1916	1353	0	561	453	561	623	403	345	89	263	56	261	185	737	1790	847	243	230	455	91	0	52	113	0	276	102	610	53	486	297	339	0	66	44	275	458	33	72
Rahe101-JSA13	A068	5395	3004	100	3324	1571	3919	435	2633	3155	719	2813	0	1192	439	17	667	116	418	216	249	88	752	799	23	2484	22	326	82	32	65	760	32	404	53	745	32	958	25	177	355	132	0	136	129	254	109	253	19
Rahe102-JSA14	A069	6661	2430	346	2071	1539	3893	1530	3621	2024	2805	1801	0	434	307	13	176	138	261	147	0	86	627	245	35	1291	32	368	15	1710	54	0	42	76	0	796	128	426	0	24	625	160	0	24	85	1373	16	14	8
Rahe103-JSA15	A070	7302	1017	1199	127	3013	6700	289	1767	155	4130	92	254	0	710	180	0	426	63	123	0	3	141	33	53	693	102	45	16	316	67	148	36	200	0	361	90	71	0	81	930	184	0	66	7	65	147	184	45
Rahe105-JSA17	A071	11831	64	0	438	1062	0	2171	3267	6	3917	28	0	57	309	58	5	0	0	541	0	14	5683	11	0	1734	989	0	0	204	174	0	226	11	0	0	0	0	0	0	0	0	19	30	10	7	1134	0	100
Rahe106-JSA18	A072	6698	0	5926	1034	1215	0	1453	3308	778	2011	615	0	489	194	44	2680	464	363	619	0	335	748	267	0	994	680	0	482	0	305	0	78	273	0	0	236	0	0	662	0	151	0	167	159	183	125	0	223
Rahe107-JSA19	A073	2099	83	3752	10	861	137	1905	3289	25	9637	14	20	116	1928	1280	241	86	10	373	910	22	250	0	0	2884	135	0	400	0	367	1290	47	1415	0	51	908	0	0	131	1215	34	0	716	14	0	58	20	92
Rahe108-JSA20	A074	3848	106	0	112	2248	115	1599	251	176	3872	412	63	254	529	4	0	62	7	115	163	3	875	43	0	4348	234	0	0	93	4	2295	75	963	392	1132	0	0	24	229	35	0	0	299	22	249	5	0	299
Rahe109-JSA21	A075	3422	2298	2962	435	1483	1144	977	2641	406	1332	255	0	683	175	498	674	202	457	281	299	202	652	122	105	478	163	80	347	572	297	0	44	13	50	620	41	19	13	117	59	333	0	3	467	101	576	68	24
Rahe110-JSA22	A076	7060	3274	3701	100	1155	123	1702	5307	62	3073	42	0	260	367	208	292	41	68	424	486	57	1253	16	68	1319	320	19	285	135	389	0	69	100	0	37	0	0	72	35	555	378	78	107	36	9	528	397	109
Rahe111-JSA23	A077	2217	236	1341	6	168	3	185	2713	13	3539	7	6625	90	413	2	0	156	0	49	61	45	0	0	0	4465	526	0	20	0	363	312	641	1335	0	0	0	0	0	15	0	8	1484	487	0	0	82	0	570
Rahe112-JSA24	A078	2680	722	10	262	645	871	332	762	1679	228	435	0	399	19	20	125	104	121	23	280	34	89	84	775	2274	1015	95	24	128	26	28	26	149	217	268	22	278	582	207	167	63	0	74	17	271	11	0	33
Rahe113-JSA25	A079	5449	1562	1345	483	767	2274	642	3184	314	3207	294	0	460	148	615	844	52	1141	218	104	287	810	63	145	2207	50	69	371	0	501	0	23	100	0	0	205	79	29	303	0	226	0	76	216	214	489	1155	23
Rahe114-JSA26	A080	3909	4273	0	3232	2329	2190	802	4335	1552	1595	2029	0	1231	435	0	929	53	1967	639	115	621	1167	1593	10	2101	26	1674	188	34	255	60	136	134	0	528	339	89	0	0	26	244	0	85	320	815	92	0	70
Rahe116-JSA28	A081	6817	3542	206	2108	2931	348	1577	3831	873	1181	1275	0	886	435	47	18	251	129	289	710	124	1044	277	307	1987	574	323	35	63	200	0	154	87	0	1120	0	1336	31	96	90	99	0	38	150	618	57	92	156
Rahe117-JSA29	A082	4559	2446	189	1417	1551	3773	468	2162	1733	652	2081	0	704	340	131	0	6	176	135	166	43	73	263	561	1679	0	385	15	0	44	0	22	15	0	322	239	771	136	214	487	288	0	0	74	46	72	4	0
Rahe118-JSA30	A083	3986	2922	308	775	741	2027	46	2041	908	68	1245	0	1929	53	878	963	1798	613	61	0	178	541	319	64	1890	0	80	197	637	201	0	38	48	83	636	0	0	84	80	0	207	0	24	323	72	376	292	11
Rahe119-JSA31	A084	3460	622	2124	726	1236	1666	925	5139	0	4457	275	3096	84	720	64	1124	642	195	249	193	0	967	25	46	1348	175	165	330	0	234	0	68	25	8	0	0	0	0	12	0	257	6	20	35	0	322	0	79
Rahe120-JSA32	A085	4793	1079	8	2134	2273	5682	814	1302	2060	437	5080	0	550	78	17	0	20	0	168	699	17	22	35	39	1444	28	449	9	0	10	0	25	48	0	1346	0	1849	205	822	54	42	0	59	81	693	0	69	72
Rahe121-JSA33	A086	4957	4951	267	463	770	79	1761	3279	1155	2724	64	0	57	478	246	186	102	207	936	183	117	0	63	0	2170	20	647	568	223	272	0	8	46	0	200	14	0	0	40	411	403	0	5	0	24	201	28	13
Rahe122-JSA34	A087	3181	1363	362	1036	967	313	438	2061	568	1116	1148	0	947	178	136	139	306	325	99	112	72	323	193	3	1660	185	87	102	309	158	95	103	79	0	130	36	173	0	95	36	121	0	73	80	0	120	69	68
Rahe123-JSA35	A088	4952	873	3928	1277	1733	2089	678	2772	975	2143	909	0	473	194	786	0	0	0	667	22	2	1112	234	24	462	39	179	0	0	274	0	0	17	0	365	0	0	7	46	0	308	0	7	0	17	734	0	2
Rahe124-JSA36	A089	3333	2359	547	996	1574	2742	381	1524	1496	584	1883	0	800	51	783	319	413	765	316	343	192	1455	487	132	1012	15	574	86	95	167	0	48	0	0	782	57	36	68	62	0	218	0	11	158	177	88	347	11
Rahe125-JSA37	A090	385	116	16	1515	2158	108	888	1119	165	6039	0	0	160	532	932	0	0	553	363	103	34	311	0	0	887	486	1766	114	0	95	207	346	223	0	0	0	0	0	135	0	293	105	141	103	0	633	87	298
Rahe127-JSA40	A091	3438	307	51	51	403	392	663	60	1251	940	37	0	372	2883	2632	252	244	31	113	1355	5	0	5	9	3262	90	102	15	12	459	112	512	2063	0	108	57	0	0	274	0	15	7	1169	10	60	148	69	100
Rahe128-JSA50	A092	3836	742	142	867	1381	4393	1270	1523	1330	877	2606	0	782	171	371	114	0	462	103	677	62	166	284	1629	2627	80	369	38	0	54	0	0	0	333	764	0	823	1424	758	21	101	0	10	92	855	246	0	5
Rahe129-JSA51	A093	1576	3029	1424	333	1018	98	696	3642	602	3215	0	0	301	157	772	325	358	941	588	144	538	1958	64	42	468	51	0	796	1207	375	6	25	17	0	49	301	0	0	0	165	378	0	22	406	22	481	305	19
Rahe130-JSA52	A094	6491	1352	1244	562	1207	227	307	3345	464	1342	1683	0	1392	84	206	537	137	240	137	37	116	63	91	253	1023	646	263	62	189	70	0	195	225	0	0	67	12	67	39	0	178	0	41	19	26	74	40	255
Rahe132-JSA54	A095	8746	19	5744	0	207	155	981	6593	83	4452	0	0	22	2177	11	159	94	17	64	59	28	533	0	0	758	429	0	171	0	148	4	206	303	0	129	0	0	0	12	141	353	25	59	0	0	184	0	195
Rahe133-JSA56	A096	1533	1383	235	56	1617	3625	2005	4374	81	5175	27	0	0	1931	101	259	207	45	701	148	5	1478	36	1109	3453	39	805	4	20	24	0	30	81	0	0	167	1945	18	0	41	331	0	19	0	6	15	0	29
Rahe134-JSA57	A097	7183	3089	648	490	1341	2056	825	4688	223	2879	13	0	252	238	532	2007	965	1370	371	0	372	2224	171	62	1269	350	7	888	1250	514	0	205	337	0	305	438	113	0	43	57	280	0	175	375	29	388	948	86
Rahe135-JSA68	A098	363	6169	790	433	1150	27	2442	2875	81	5882	22	0	120	1236	8	0	17	0	1100	605	49	16	932	1501	4998	128	0	20	0	84	0	218	1399	0	0	0	0	52	0	0	48	181	396	0	84	49	0	219
Rahe136-JSA59	A099	3973	2139	586	601	1685	1619	854	1964	716	1096	830	0	658	220	1078	1397	206	1455	272	330	131	491	58	21	2025	77	116	170	260	453	16	45	30	201	1069	449	68	21	202	216	136	7	23	156	219	636	889	26
Rahe137-JSA60	A100	5496	2266	1691	392	2236	1945	91	1783	368	352	1437	0	442	1144	127	138	315	69	106	586	86	94	143	573	2248	313	104	25	1283	52	0	67	138	206	835	34	747	348	770	476	97	0	16	0	491	177	20	114
Rahe138-JSA61	A101	5382	1103	872	494	707	312	736	3637	341	1161	1331	0	0	131	13	431	113	32	175	0	42	993	0	43	580	153	220	122	1323	204	0	42	113	57	143	0	408	53	8	466	292	0	75	300	617	252	11	52
Rahe140-JSA63-32119	A102	65	820	19	96	361	0	160	2924	25	2103	56	4345	43	222	4	14	70	0	402	0	10	1093	4	8	1335	88	3	209	0	904	0	103	560	110	163	0	0	0	0	0	6	893	149	35	0	3	0	187
Rahe142-JSA64-5919	A103	3939	3378	2039	503	1180	422	734	2736	786	1413	266	0	0	383	343	926	363	480	424	219	155	304	275	67	961	64	0	367	1011	285	17	54	34	0	0	567	0	107	360	26	123	8	32	23	37	86	227	17
Rahe144-JSA65	A104	1273	498	359	363	418	519	432	648	804	522	565	0	584	21	176	1045	457	809	71	297	150	309	80	18	2286	87	22	200	0	109	4284	204	737	0	221	0	493	4	51	0	183	0	354	368	35	188	1079	153
Rahe145-JSA67	A105	5318	1907	452	1249	542	799	742	4088	1063	1090	281	0	745	525	455	293	148	510	181	159	203	739	186	1715	838	514	187	134	907	245	918	90	283	0	698	34	1020	320	78	1021	149	3	166	153	8	207	322	102
Rahe147-JSA70	A106	5101	618	0	749	4618	371	5020	1361	226	1011	205	0	455	1531	34	0	0	79	974	443	86	233	8	0	1761	0	350	0	416	87	0	16	31	0	1124	28	1778	7	74	0	329	0	11	45	37	3	0	0
Rahe148-JSA71	A107	3699	789	0	664	926	1415	298	571	250	830	169	77	0	248	7	0	278	0	70	69	17	0	2	280	1342	364	0	10	0	36	790	124	369	33	0	518	126	17	2768	0	16	41	241	0	0	111	0	230
Rahe149-JSA72	A108	684	221	0	243	633	1409	0	317	506	0	1186	0	389	87	13	0	93	18	176	277	19	51	10	672	1608	40	393	10	0	33	28	5	44	96	386	32	212	271	18	123	21	0	34	104	125	0	26	17
Rahe166-NK33	A109	3696	3094	39	893	1571	4730	795	2428	1437	830	2615	0	776	335	505	158	28	744	408	106	77	282	531	40	1203	92	509	27	205	87	0	47	0	0	286	218	469	27	611	72	211	0	7	153	674	47	0	22
Rahe167-NK34	A110	2830	877	40	520	963	1579	470	1084	695	618	735	0	118	116	196	589	75	508	93	169	65	249	75	135	2265	96	100	37	249	64	1890	114	29	0	70	592	86	101	873	7	104	20	104	63	194	270	0	79
Rahe169-NK35	A111	2761	1008	0	541	476	2202	230	1520	1082	979	612	0	759	87	14	314	243	1109	136	177	154	304	65	137	1269	104	244	77	0	72	1397	80	864	0	138	283	217	36	53	0	191	0	170	139	390	237	46	104
Rahe170-NK36	A112	5482	2566	908	2602	2787	567	709	5887	4085	2802	575	0	1279	1223	65	0	215	1001	250	484	216	769	308	165	1966	342	540	96	1094	148	6	184	40	0	271	153	651	43	222	71	347	0	14	81	308	238	81	48
Rahe171-NK37	A113	4126	1672	884	523	1166	2446	0	1372	623	838	947	0	57	137	135	260	145	441	235	155	43	59	11	124	2512	462	410	28	262	89	0	276	831	0	213	67	0	41	703	99	87	27	594	46	327	178	32	122
Rahe172-NK57	A114	3883	4288	3263	313	1268	470	1444	3352	629	1938	1183	0	536	154	36	0	585	13	347	317	186	1045	288	7	1373	287	16	120	390	389	0	424	56	0	282	0	175	0	173	0	476	0	90	132	54	254	0	137
Rahe173-NK38	A115	4997	1684	2244	1146	2802	88	1250	4158	289	4325	166	0	306	1486	57	943	166	154	437	233	167	1996	11	12	557	105	12	215	1171	229	8	62	75	26	353	45	972	0	69	0	438	30	17	53	159	395	0	74
Rahe175-NK40	A116	1174	586	414	849	550	929	361	1127	815	379	1059	0	1277	86	25	112	115	132	68	149	104	688	115	0	894	0	233	59	94	43	0	0	40	0	187	38	419	4	0	340	127	0	6	268	366	61	36	13
Rahe176-NK41	A117	1693	973	0	763	1084	2204	1052	1411	1075	622	2234	0	198	189	391	943	205	145	302	209	93	292	140	209	2230	84	250	184	56	71	233	61	209	45	175	20	396	0	102	0	38	0	37	284	258	58	85	30
Rahe177-NK42	A118	1968	321	0	666	410	1169	500	789	1128	0	2199	0	222	24	0	0	9	0	31	63	19	52	113	43	1488	58	281	0	0	5	0	8	0	0	82	0	376	78	454	31	13	0	0	84	200	0	0	2
Rahe178-NK43	A119	5250	1112	1421	629	1384	3994	667	2346	1348	1978	1132	342	237	293	138	745	639	643	254	203	108	1146	297	637	1396	429	211	265	1345	176	0	134	105	27	324	113	0	295	408	0	370	46	197	148	862	223	280	166
Rahe179-NK44	A120	4255	374	0	1034	1782	5507	400	984	2742	16	1669	0	888	578	6	0	68	0	120	517	17	153	255	163	1724	53	235	8	220	13	2758	29	334	0	1485	190	1642	140	561	370	80	0	181	72	256	5	0	19
Rahe180-NK45	A121	1909	1800	334	465	834	1178	253	1375	693	389	999	0	27	40	104	231	47	535	103	188	117	189	164	43	1325	49	502	55	659	91	246	23	134	0	389	98	349	22	85	184	53	0	29	100	83	28	0	31
Rahe181-NK46	A122	3006	1330	62	923	820	3702	374	1285	941	777	792	0	1088	205	187	96	107	300	166	79	102	138	93	66	955	47	138	29	0	49	1174	46	586	0	591	353	113	72	47	158	52	0	137	67	841	104	0	34
Rahe182-NK47	A123	1921	1043	771	178	371	2244	201	1177	648	360	473	42	42	49	82	258	330	194	21	316	34	130	168	122	1952	227	66	74	212	30	1132	61	690	0	122	791	421	18	947	114	68	0	103	68	0	98	575	78
Rahe183-NK48	A124	3759	3806	9	629	1851	1571	1644	1647	709	1017	1553	0	1050	434	11	43	10	437	187	304	64	100	42	9	1623	59	353	16	0	75	0	206	219	0	1442	0	1184	0	581	12	73	0	19	121	17	175	0	171
Rahe185-NK50	A125	6470	1558	72	628	2159	204	855	2001	1392	2136	36	4	17	720	12	41	112	24	346	383	29	12	0	22	5072	862	87	3	46	52	0	610	13	106	0	0	0	63	411	0	156	5	212	13	431	46	14	98
Rahe186-NK51	A126	6031	353	0	2007	3137	1084	1029	1411	1258	330	5086	0	678	722	0	0	42	0	350	104	32	21	146	332	2512	76	1792	0	83	19	0	8	106	379	1419	34	960	1249	289	740	66	0	107	54	750	87	3	47
Rahe187-NK53	A127	4724	419	217	401	1831	989	473	1016	540	1129	1010	0	29	1250	165	0	0	0	173	87	8	19	74	0	1666	179	179	7	67	23	0	0	981	0	607	468	1046	19	629	184	30	0	126	30	418	25	0	207
Rahe188-NK54	A128	2794	6005	18	818	1530	2453	1304	1923	1282	1323	2439	0	906	340	1563	0	63	963	666	265	284	780	353	109	1481	20	236	164	928	136	0	31	19	0	174	4	143	225	235	0	184	0	21	1143	184	147	0	5
Rahe189-NK55	A129	6288	48	45	1387	3192	2607	1057	726	488	27	2089	0	31	867	27	0	55	89	169	250	11	0	28	781	912	115	108	0	327	22	0	53	33	0	0	0	822	488	103	220	0	0	19	0	512	12	0	19
Rahe190-NK56	A130	3171	2085	693	981	1078	5365	301	2294	1403	1167	2366	0	0	134	615	0	1057	1341	221	54	349	370	547	38	1438	39	263	247	0	94	16	28	19	0	1136	263	367	40	21	0	225	0	11	10	992	50	61	25
Rahe191-NK58	A131	10830	1273	2452	7	331	0	132	7803	0	2600	6	325	0	947	0	968	163	58	141	127	16	47	0	8	2153	33	0	108	64	617	0	77	11	0	51	0	0	0	17	0	74	12	4	5	0	459	457	23
Rahe193-NK60	A132	4852	1292	578	366	1351	1588	704	2184	301	2469	262	0	306	561	34	90	297	25	74	139	57	682	54	41	1574	445	69	87	279	95	872	858	1258	289	144	217	0	98	190	355	56	0	227	30	23	142	116	438
Rahe194-NK61	A133	5740	3151	838	868	1369	2987	655	2626	873	1193	470	0	2325	341	1133	352	267	1221	179	246	297	1479	150	116	1044	183	378	34	0	234	0	53	95	0	544	183	308	37	48	335	196	0	52	433	54	578	102	84
Rahe195-NK62	A134	2007	910	168	191	329	54	133	1139	162	662	0	0	108	25	95	344	318	170	36	108	114	110	0	32	3642	464	7	51	214	45	2430	599	1145	0	14	22	0	0	112	19	25	22	328	13	76	141	63	131
Rahe196-NK63	A135	1684	764	159	298	627	576	185	884	431	499	235	0	232	117	11	68	95	60	75	215	40	278	95	3	1399	288	22	35	337	51	891	238	222	0	331	122	759	10	54	0	21	0	35	15	43	26	0	107
Rahe197-NK64	A136	6546	1132	1377	270	2861	4769	62	2266	271	1972	695	628	63	666	29	948	17	176	96	0	25	269	21	370	695	173	212	58	0	129	59	38	89	16	647	618	126	49	244	338	130	0	0	0	87	240	945	38
Rahe198-JSA66	A137	3572	2750	1649	380	1499	881	1363	3156	191	610	80	0	0	287	542	875	110	472	265	155	216	865	18	74	1869	207	182	171	1127	321	0	15	0	0	780	0	0	28	102	0	478	0	3	68	24	252	0	28
Rahe199-NK66	A138	1285	549	4050	17	1002	214	1077	2250	83	1686	0	2724	20	134	0	0	145	0	287	0	4	1027	0	27	1036	926	0	171	0	331	0	268	217	39	0	11	0	0	92	0	109	57	171	6	0	339	19	110
Rahe200-NK67	A139	2590	1519	428	481	637	1381	378	1702	1029	1066	577	0	828	127	309	1077	211	944	199	0	224	483	128	45	1461	99	142	301	629	287	219	92	221	0	156	323	130	12	262	0	122	0	110	326	308	140	1062	32
Rahe202-NK69	A140	3541	2005	1505	467	356	54	328	2222	318	1655	133	0	276	235	264	315	240	4	281	0	216	2319	55	10	458	25	0	341	1250	319	20	44	254	25	311	48	0	0	0	11	201	0	72	372	49	302	55	119
Rahe203-NK70	A141	2360	1678	121	758	846	79	231	1736	230	2142	54	0	894	481	358	26	176	409	170	48	29	189	125	5	908	118	0	154	111	103	1658	92	969	1138	49	32	0	0	9	625	73	0	604	126	269	250	277	24
Rahe204-NK71	A142	5030	229	2606	1525	1388	0	438	3259	9	2728	0	0	0	821	0	569	35	232	52	893	0	0	0	425	331	475	0	70	0	170	0	0	0	0	609	25	59	0	399	30	94	0	5	0	0	139	0	60
Rahe205-NK72	A143	9869	492	2959	220	742	29	816	4187	34	3332	0	0	0	588	13	0	652	0	114	0	21	779	0	188	1326	206	16	337	505	168	3	474	183	0	561	0	0	372	16	14	130	71	68	0	0	44	0	250
Rahe206-NK73	A144	2689	1330	592	1379	942	2006	1158	1956	2359	898	613	0	933	160	480	2136	264	906	158	281	318	153	429	7	2020	60	270	452	0	322	0	114	165	0	351	460	203	12	129	383	185	0	158	88	191	381	163	55
Rahe207-NK74	A145	8429	324	1763	26	250	175	456	2248	27	1299	40	0	0	653	0	0	84	0	302	168	29	33	0	0	612	59	0	150	382	603	41	35	42	0	78	15	0	0	0	17	34	29	51	28	25	448	1299	127
Rahe208-NK75	A146	6263	618	1851	516	1753	261	398	1896	48	1415	213	0	0	363	59	242	225	31	304	96	40	1000	38	0	478	21	22	42	1380	248	70	42	479	9	458	51	30	50	32	164	182	0	87	73	92	246	0	96
Rahe210-NK77	A147	7295	2371	2758	471	1998	37	938	4177	586	3435	52	0	4045	191	412	552	103	1026	777	194	449	4731	312	0	1460	192	63	312	264	934	0	223	14	0	191	0	18	100	36	0	428	30	0	1047	20	363	0	111
Rahe211-NK78	A148	5316	2579	178	999	617	1023	1478	2793	598	825	552	0	966	267	36	431	68	123	60	120	49	603	111	174	2304	66	473	56	141	81	178	13	204	0	280	0	563	107	293	132	105	0	51	85	218	158	71	0
Rahe212-NK79	A149	2221	3755	108	654	928	2969	988	1796	1406	460	1970	0	418	115	975	151	348	455	78	122	276	957	668	146	748	128	340	296	498	251	27	61	48	0	571	0	1366	142	119	0	85	0	0	161	54	132	0	22
Rahe213-NK80	A150	6156	2905	0	1585	1204	2172	771	2882	1310	838	4520	0	813	376	386	107	207	968	337	314	111	445	226	4	777	94	530	36	0	66	0	0	17	0	248	123	0	0	21	68	73	0	0	44	0	271	0	6
Rahe214-NK81	A151	8228	919	2810	67	342	7	944	3521	94	2175	51	0	143	133	0	0	0	12	138	368	10	983	0	5	1224	879	0	384	0	411	716	92	1545	1074	32	0	0	0	43	0	118	0	635	7	23	133	0	32
Rahe215-NK82	A152	3209	3920	581	779	1858	1956	1671	1563	1507	1814	2459	40	492	384	241	291	414	642	303	318	132	757	1005	0	958	0	230	129	0	109	496	107	150	18	1628	193	125	44	151	156	166	0	101	578	187	32	29	47
Rahe216-NK83	A153	3012	896	568	850	1123	2888	508	2125	1545	1728	2041	0	1447	177	568	3654	543	1236	221	287	584	346	286	136	1154	0	415	79	0	216	8	0	0	0	291	741	62	0	123	119	270	0	0	263	118	144	0	0
Rahe217-NK84	A154	3818	1336	420	1054	1148	4271	718	1025	920	1690	1439	0	34	625	31	0	33	6	163	0	4	55	8	1522	1140	556	175	28	0	10	18	72	308	0	206	0	546	1064	410	291	34	0	0	0	380	3	0	4
Rahe218-NK85	A155	4111	480	4410	727	577	1105	516	3114	967	964	1148	0	1251	115	1401	0	53	229	146	80	437	1172	260	412	758	139	693	564	297	261	3	193	0	343	462	235	382	285	196	43	157	0	82	436	168	677	0	57
Rahe221-NK87-32219	A156	6399	4955	5070	205	2147	1316	1304	3349	372	2775	435	0	434	465	1015	798	214	638	581	178	305	284	11	129	1247	243	509	159	782	363	40	131	61	150	554	692	45	8	176	0	286	0	40	480	20	811	164	36
Rahe222-NK88	A157	1010	296	258	0	40	0	326	3083	39	5065	0	5287	29	573	0	912	65	0	41	237	5	35	0	0	1680	99	0	0	0	111	174	210	430	106	0	0	0	0	0	0	24	1818	181	0	0	45	0	888
Rahe223-NK89	A158	6106	2193	701	257	1341	1621	1423	2993	0	2809	6	0	0	323	1645	2691	384	126	140	433	105	1656	0	0	1344	0	0	213	0	84	0	0	12	0	580	78	0	0	44	0	172	0	0	711	0	159	0	5
Rahe224-NK90	A159	2612	116	592	0	120	7	496	1810	157	970	0	2459	31	122	8	103	82	0	113	29	0	607	0	0	681	152	0	81	0	521	0	169	978	160	0	0	0	0	12	0	39	34	262	33	7	119	1303	144
Rahe225-NK91	A160	4429	83	29	444	1718	700	466	226	154	1410	1138	0	721	159	16	16	0	64	41	20	0	14	118	38	3831	465	79	9	0	6	7	27	47	0	964	0	34	252	1913	0	14	0	58	0	33	46	4	62
Rahe226-NK92	A161	3526	525	832	511	699	1969	881	2911	760	2694	121	0	2137	197	93	1716	165	349	203	108	32	402	190	224	1264	97	29	175	0	75	0	96	816	0	45	124	0	82	81	0	316	0	243	438	67	117	0	39
Rahe227-NK94	A162	4093	3153	0	2304	1047	3079	472	1500	2952	150	2420	0	1687	220	124	80	369	1505	143	316	101	691	241	187	3944	0	297	91	349	89	68	54	157	0	756	80	1377	46	178	600	231	0	69	513	436	325	39	103
Rahe228-NK95	A163	1824	924	0	2226	1362	4044	789	1744	2489	102	5019	0	52	373	9	0	0	176	179	73	30	6	1077	18	1685	42	425	0	41	13	41	74	61	0	2568	0	1446	34	406	195	22	0	50	92	25	0	0	46
Rahe229-NK96	A164	5545	1531	1651	68	598	749	1165	2244	306	1142	57	0	52	259	64	696	686	149	175	0	57	788	0	50	2059	784	9	212	107	160	956	250	480	0	116	0	25	17	172	137	143	3	116	20	0	184	355	244
Rahe232-JSA74	A165	2581	768	983	274	451	607	434	1814	203	1080	49	0	401	46	234	662	648	529	77	135	263	540	63	40	1059	19	0	375	470	241	16	18	52	0	47	35	52	14	40	11	271	0	13	442	21	1186	833	10
Rahe233-JSA75	A166	2363	33	690	152	890	3487	607	1932	1337	580	856	0	518	132	1477	1281	48	2114	380	25	311	160	230	97	2366	164	2789	171	491	75	0	70	6	159	329	600	167	22	234	13	390	4	18	60	30	338	470	46
Rahe234-NK97	A167	2108	707	0	1744	1976	1011	1390	1803	693	3476	1680	0	11	640	10	565	4	130	172	166	0	719	75	0	527	0	198	6	0	31	339	0	852	81	1169	0	194	0	307	243	55	0	526	40	8	46	0	114
Rahe235-NK98	A168	2228	1991	855	1636	1069	1027	136	2087	2158	134	3407	0	1922	68	533	177	101	775	124	76	508	460	517	8	2618	94	971	162	74	177	0	15	0	0	286	9	198	0	49	127	219	0	3	489	300	304	24	25
Rahe236-NK99	A169	3277	796	1057	329	445	10	1437	3345	772	1918	15	0	725	381	31	553	119	56	159	104	163	1015	11	0	1907	94	185	136	56	122	0	112	555	142	42	74	407	0	389	12	289	96	270	80	6	124	293	66
Rahe237-NK100-63	A170	3365	12	0	279	2539	5	0	4445	0	7743	0	2652	19	2433	0	0	0	0	192	0	0	0	0	0	3436	394	8	0	0	13	0	0	0	374	690	36	0	0	235	0	0	127	0	0	0	0	3	171
Rahe239-NK101	A171	2846	1445	1403	530	414	703	544	3126	758	527	204	0	1796	43	737	1086	738	1946	127	389	597	1639	141	18	1116	27	10	320	848	374	0	43	159	0	186	54	668	0	62	114	288	0	85	531	8	471	631	51
Rahe240-NK102	A172	7468	1834	753	201	1099	85	920	3889	63	4096	54	0	552	751	304	370	65	297	346	158	117	356	8	18	1361	383	57	171	0	356	0	165	275	0	1012	0	0	175	304	12	378	63	123	45	0	384	618	448
Rahe241-NK103-51	A173	3984	2092	2561	762	1276	1429	1095	3036	341	1856	199	0	2162	236	854	1908	520	1722	294	142	338	1667	54	319	1034	95	28	672	73	593	0	148	365	0	476	44	0	110	120	640	198	0	295	1141	208	1050	0	161
Rahe243-NK104	A174	4068	1079	107	235	1179	2388	278	532	212	737	1846	0	33	117	88	155	1434	36	15	195	79	66	17	341	3293	283	19	50	0	39	175	370	151	0	304	0	27	139	368	209	171	0	58	29	374	106	261	86
Rahe244-NK105-510	A175	6200	2034	621	312	819	584	352	2087	400	1121	512	0	481	93	192	380	880	275	98	283	163	642	236	177	1476	899	56	104	676	155	0	292	368	0	26	68	251	235	203	171	174	3	86	68	115	149	162	252
Rahe246-NK106	A176	7040	139	3149	6	51	0	580	4465	33	3198	0	0	0	248	2	112	22	38	299	0	36	3021	0	4	1715	23	0	552	428	1233	56	15	29	0	0	0	0	38	0	0	18	11	15	0	0	225	69	68
Rahe248-NK108	A177	611	515	4310	316	377	53	334	2733	84	1194	139	3446	49	205	419	1485	154	36	570	0	54	2494	23	3	614	0	28	584	951	653	62	44	116	0	95	97	0	0	94	0	206	423	55	81	0	389	0	0
Rahe251-NK111	A178	5175	3114	2497	336	563	384	643	3150	589	1577	0	0	0	191	414	283	113	402	640	45	263	277	0	0	739	139	89	367	711	465	4	25	0	36	1522	0	72	0	0	0	320	0	3	22	45	172	1992	3
Rahe252-NK112	A179	3073	3015	204	969	1557	2900	962	3153	1283	1507	2148	0	1096	143	173	742	1220	1401	326	30	234	569	325	33	1619	0	546	251	793	108	0	0	12	0	610	265	524	26	91	341	201	0	6	288	1037	161	177	5
Rahe253-NK113	A180	5951	2145	4115	498	1584	1890	935	3454	1075	1570	805	0	731	170	401	334	143	475	262	193	277	468	98	274	1366	132	272	285	439	413	159	53	131	0	277	0	376	70	138	66	221	0	106	112	192	167	1008	20
Rahe254-NK114	A181	2682	947	71	1092	1902	3897	972	1048	937	293	2403	0	679	313	32	0	51	806	316	112	93	240	38	557	2861	136	290	26	186	35	123	31	104	0	724	19	1713	614	103	0	80	4	33	138	756	69	0	39
Rahe255-NK115	A182	6843	1400	861	1787	1320	994	1233	4509	922	858	525	0	2562	191	113	72	200	1130	319	861	319	750	233	224	1491	54	107	374	0	135	12	50	0	0	0	0	686	49	0	19	186	0	58	161	29	375	209	33
Rahe256-NK116	A183	11199	8	6	0	723	1742	31	102	0	1639	0	0	10	137	0	0	10	0	0	0	2	3	0	0	1499	131	0	0	0	0	0	0	33	0	0	120	0	0	10061	0	0	507	8	0	0	0	0	0
Rahe257-NK117	A184	2647	3079	1385	782	767	717	752	2317	1462	845	740	0	327	38	106	468	39	595	300	56	472	427	301	4	1590	40	97	506	840	352	0	65	68	0	373	0	705	20	167	79	83	0	16	347	554	220	1242	10
Rahe258-NK118	A185	1660	374	5	1411	1632	391	0	1995	748	27	1973	0	532	148	446	68	1234	112	19	0	18	3	47	0	1070	0	1648	72	0	50	515	539	2566	0	99	682	1537	0	4	31	20	0	454	4	529	82	64	629
Rahe259-NK119	A186	1649	1655	0	2289	830	4292	1454	1374	2715	179	5515	0	335	301	447	42	7	369	75	275	63	231	175	60	3157	41	183	24	0	63	245	31	137	0	585	0	788	173	247	432	74	0	90	26	0	20	0	27
Rahe260-NK120	A187	1814	357	0	1004	1310	351	0	1624	841	31	1736	0	485	80	322	44	1063	50	0	24	14	0	213	6	1697	0	1080	51	0	22	1893	548	3690	0	57	630	1266	0	0	13	38	0	1805	6	513	59	63	644
Rahe261-NK121	A188	3812	2504	530	772	2232	3243	1517	2381	380	2066	1235	0	562	702	807	662	104	191	300	556	58	287	82	187	1740	173	899	42	65	58	0	44	92	0	435	158	68	123	212	70	277	36	77	4	548	121	91	47
Rahe262-NK122	A189	4535	2670	0	4	1121	4598	0	1975	1969	1221	0	0	0	327	0	722	294	1604	443	146	1231	916	722	514	1410	498	1145	429	0	132	0	588	53	0	393	0	1434	0	344	46	153	38	87	80	0	27	0	287
Rahe263-NK123	A190	5027	4068	1117	962	595	1995	444	3260	1066	2534	806	0	90	383	676	1231	204	569	165	83	144	134	101	10	1570	134	174	208	895	168	0	16	32	0	106	0	24	6	29	0	277	0	12	10	800	240	227	10
Rahe264-NK124	A191	5499	4959	5036	126	787	10	1685	4697	192	3601	7	592	435	104	23	0	325	7	395	211	74	1991	0	0	1390	454	0	663	0	334	1382	740	1435	386	0	467	0	0	176	0	145	127	892	0	9	764	0	363
Rahe265-NK125	A192	5514	7412	685	988	2480	4948	1970	3281	2046	1347	1594	0	816	421	734	359	65	325	546	177	206	100	96	276	2930	266	694	67	125	156	0	87	143	0	331	167	504	109	290	359	287	0	136	36	571	120	263	34
Rahe266-NK126	A193	4143	2504	353	922	408	2045	817	2534	1643	216	1095	0	1019	82	5	0	223	275	127	252	235	1751	188	1025	4068	694	470	20	0	98	0	331	915	104	1155	0	1360	91	666	493	41	7	535	455	294	271	6	339
Rahe267-NK127	A194	4797	5792	98	1677	2568	6783	1857	5408	1326	2862	502	0	337	250	36	0	256	484	85	110	13	0	87	2006	1095	150	221	34	16	30	525	249	308	0	223	0	20	1068	33	0	625	0	81	0	0	341	0	169
Rahe268-NK129	A195	7989	1059	570	1363	1244	957	1007	3292	348	2299	276	0	123	396	43	2299	38	269	87	179	39	106	0	441	3507	65	12	58	66	124	0	58	1460	0	595	140	168	336	58	397	85	0	34	8	48	202	33	110
Rahe269-NK130	A196	4480	5917	37	682	697	1997	1905	4426	262	1704	9	0	41	484	608	2474	2484	480	277	29	403	5403	2	31	1379	81	0	508	0	216	0	24	17	0	1159	0	0	0	6	0	469	2	0	0	0	550	0	0
Rahe270-NK131	A197	5929	2619	3172	231	2618	12	2677	5405	49	6928	17	677	68	142	527	2082	118	215	954	93	174	1364	5	0	1037	267	0	1153	77	961	2	39	106	281	30	0	0	0	102	0	200	36	53	219	13	521	2654	37
Rahe271-NK132	A198	4289	29	1333	3677	2205	10009	1061	2954	3466	1548	9953	0	793	611	69	0	215	0	884	33	112	5	787	5	1670	39	1309	118	0	97	0	22	5	0	904	24	463	56	22	392	433	0	3	0	11	37	0	7
Rahe276-NK65	A199	7565	6638	8	657	783	832	190	3690	1686	2474	657	0	1514	215	94	0	0	795	1435	0	44	4764	492	0	1254	248	0	579	0	401	0	234	45	0	1062	0	0	0	688	0	267	0	105	0	524	397	0	119
Rahe278-NK93	A200	2333	961	714	935	3082	4830	1548	1825	1323	1372	618	0	1601	311	280	909	317	1362	305	391	189	1207	336	88	1178	46	32	281	685	79	0	120	54	0	496	248	519	24	108	1148	272	0	92	129	429	210	383	115
Rahe287-NK128	A201	6974	11391	3001	508	1975	8	3532	5977	35	5293	76	169	379	303	54	20	104	31	1159	0	83	1083	0	10	2906	331	131	164	14	1082	0	332	193	0	104	0	0	22	140	0	123	363	258	0	25	312	0	136
[truncated: 508 more columns]

## Sheet: MetadataShenAdami
ID	Gender	Age	TobaccoUsage_status	Caries_Surfaces	Long term Med_Count	NumberOfSystemicDiseasesChronic	NumberOfSystemicDiseasesLinkedtoOralMicrobiome	Perio Disease Stage
A001	Male	79	No	28	5	4	3	3
A002	Female	49	Yes	0	23	15	14	2
A003	Female	57	No	0	2	3	3	2
A004	Female	44	No	0	0	0	0	3
A005	Female	44	No	6	0	0	0	2
A006	Male	74	No	1	1	2	2	3
A007	Male	35	No	1	1	1	1	1
A008	Female	19	No	6	0	0	0	2
A009	Female	67	No	9	5	5	3	2
A010	Male	31	No	0	0	0	0	3
A011	Male	29	Yes	48	0	0	0	2
A012	Female	68	No	0	5	6	4	3
A013	Female	41	No	2	0	1	1	2
A014	Female	38	No	1	0	0	0	1
A015	Female	36	No	1	0	0	0	1
A016	Female	41	No	2	1	0	0	2
A017	Female	52	Yes	5	3	6	5	3
A018	Male	64	No	20	5	2	2	4
A019	Male	51	No	0	2	2	2	2
A020	Male	58	No	0	6	3	3	3
A021	Female	59	No	0	2	2	1	3
A022	Male	28	Yes	2	0	0	0	2
A023	Female	81	No	0	3	2	2	3
A024	Female	70	No	2	5	8	5	2
A025	Female	30	No	8	0	0	0	1
A026	Male	33	Yes	28	1	1	1	3
A027	Male	30	No	5	0	0	0	2
A028	Female	65	No	6	17	9	6	3
A029	Female	59	Yes	10	1	3	2	3
A030	Male	75	Yes	0	5	7	2	2
A031	Male	68	No	11	5	4	4	2
A032	Male	70	Yes	3	7	3	3	4
A033	Female	33	No	4	0	1	0	4
A034	Male	18	No	0	1	1	0	1
A035	Female	28	Yes	0	1	1	1	2
A036	Female	65	Yes	18	2	5	4	2
A037	Male	58	No	0	6	3	3	3
A038	Female	35	No	1	1	0	0	2
A039	Female	32	No	0	1	0	0	1
A040	Female	57	No	0	1	3	2	3
A041	Female	60	Yes	5	4	7	3	4
A042	Male	76	No	3	10	8	7	3
A043	Female	35	No	18	0	0	0	1
A044	Male	60	No	16	4	5	5	3
A045	Female	50	No	16	6	2	2	3
A046	Female	73	No	1	0	0	0	4
A047	Female	61	No	5	15	9	8	3
A048	Male	74	No	0	0	2	1	3
A049	Female	77	No	4	1	4	3	3
A050	Female	40	No	1	0	2	0	2
A051	Female	83	No	0	1	1	1	4
A052	Male	77	No	5	9	4	4	1
A053	Male	70	No	0	0	0	0	1
A054	Female	24	No	0	13	2	2	2
A055	Female	63	No	0	1	3	3	1
A056	Female	60	No	0	0	2	2	1
A057	Male	48	Yes		0	2	0	2
A058	Female	49	No	0	1	2	2	1
A059	Male	60	No	12	6	4	4	3
A060	Male	58	No	0	0	1	1	3
A061	Male	68	No	0	6	5	3	2
A062	Male	49	No	2	0	0	0	2
A063	Male	25	No	1	0	0	0	2
A064	Male	56.8597	No	2	1	3	3	2
A065	Female	75.7125	No	4	0	3	3	4
A066	Female	65	No	0	7	5	5	2
A067	Female	30.8501	Yes	3	4	2	2	2
A068	Female	58.2286	No	0	0	0	0	3
A069	Female	38.2368	No	3	6	3	3	2
A070	Female	31.091	No	8	1	0	0	4
A071	Male	63.7399	No	4	2	1	0	4
A072	Male	24.46	No	1	0	0	0	1
A073	Female	34.4531	No	6	0	4	3	1
A074	Female	49.7029	No	0	4	4	3	3
A075	Female	24.2218	No	0	0	0	0	2
A076	Male	66.527	No	0	1	3	1	2
A077	Female	34.8501	No	1	1	1	0	1
A078	Female	39.1869	No	2	0	0	0	1
A079	Female	36.8296	No	1	0	1	1	3
A080	Male	44.5749	No	1	2	1	0	2
A081	Female	69.0212	No	2	1	1	0	4
A082	Female	66.0999	Yes	0	7	3	3	2
A083	Female	57.9877	No	2	9	6	5	3
A084	Male	35.5565	Yes	24	0	0	0	4
A085	Female	36.167	No	8	1	1	1	3
A086	Female	28.8268	No	1	0	5	2	1
A087	Female	33.3005	No	14	1	1	1	1
A088	Female	57.5633	Yes	0	14	8	8	2
A089	Male	22.705	No	0	0	2	2	2
A090	Female	48.2355	No	2	0	3	2	1
A091	Female	24.0986	No	1	0	0	0	1
A092	Female	21.911	No	12	0	0	0	1
A093	Female	25.9001	No	1	0	0	0	1
A094	Male	33	No	33	0	1	0	2
A095	Male	31.6441	No	2	4	2	2	1
A096	Female	55.9261	No	2	4	2	2	1
A097	Male	41.5852	No	6	0	0	0	2
A098	Female	58.7899	No	5	12	9	4	3
A099	Female	52.4846	No	0	4	5	4	2
A100	Female	26.5955	No	0	1	1	1	2
A101	Female	73.0924	No	0	3	3	3	2
A102	Male	59.3265	Yes	1	0	1	0	3
A103	Female	61.7851	No	3	1	1	1	1
A104	Female	30.4942	No	1	0	1	1	3
A105	Female	55.4223	No	0	6	10	7	2
A106	Male	56.3669	No	0	0	2	2	1
A107	Female	48	No	1	0	1	0	1
A108	Female	55.8056	No	2	2	2	1	4
A109	Female	37.1198	No	0	1	0	0	2
A110	Female	38.8802	No	4	0	0	0	2
A111	Female	52.4764	No	0	6	3	3	1
A112	Male	57.1335	No	1	6	4	3	3
A113	Female	61.2758	Yes	12	9	5	5	3
A114	Male	50.1547	No	0	4	3	3	1
A115	Female	57.2731	No	10	0	1	1	4
A116	Female	65.0678	No	1	2	3	3	2
A117	Female	76.3149	No	4	5	4	2	1
A118	Female	67.7673	No	18	9	7	4	3
A119	Male	43.6988	No	0	5	4	1	3
A120	Female	27.0637	No	4	0	0	0	1
A121	Female	63.2115	Yes	4	2	2	2	4
A122	Female	58.7433	No	1	4	2	2	2
A123	Female	46.4695	No	1	1	1	1	3
A124	Female	68.0876	No	1	2	3	3	1
A125	Female	68.3532	Yes	0	7	7	6	2
A126	Female	55.6632	No	0	0	0	0	2
A127	Female	45.4812	No	2	0	2	2	2
A128	Male	62.1218	No	8	1	1	1	4
A129	Male	22.8884	No	0	0	1	1	1
A130	Male	56.0164	No	13	0	1	0	3
A131	Female	43.6961	No	6	0	1	1	4
A132	Female	23.4743	No	19	0	2	2	4
A133	Male	59.8631	No	4	1	1	0	4
A134	Female	78.7844	No	0	6	5	5	3
A135	Female	45.9384	No	0	3	3	3	1
A136	Female	19.0007	No	5	0	0	0	1
A137	Female	42.4504	No	0	0	3	2	1
A138	Female	74.9158	No	0	3	5	4	1
A139	Female	29.9028	No	8	0	2	1	1
A140	Male	59.7426	No	20	8	4	4	2
A141	Male	48.4162	No	3	0	0	0	2
A142	Male	52.1615	No	1	9	2	1	2
A143	Female	33.3224	No	9	0	1	0	2
A144	Female	36.794	No	0	3	0	0	1
A145	Male	37.1745	Yes	12	0	0	0	3
A146	Female	28.3258	No	21	0	0	0	3
A147	Female	61.9959	No	2	4	1	1	2
A148	Male	27.2279	No	0	0	0	0	1
A149	Female	47.6057	No	7	7	2	2	2
A150	Female	64.7064	No	8	0	6	5	2
A151	Female	64.3751	No	1	5	3	2	2
A152	Female	61.9439	Yes	5	5	3	2	3
A153	Female	47.3511	No	1	4	2	1	1
A154	Female	39.6687	No	0	1	7	6	2
A155	Female	72.7529	No	1	1	2	1	2
A156	Male	85.358	No	16	0	0	0	4
A157	Female	71.666	No	0	10	13	12	3
A158	Male	19.6934	No	2	0	0	0	1
A159	Male	45.922	No	0	2	1	1	4
A160	Female	33.8617	No	0	2	3	3	3
A161	Female	68.0794	No	1	0	2	2	4
A162	Female	56.7584	No	0	9	3	3	3
A163	Male	45.7385	No	0	1	1	1	4
A164	Male	61.3799	No	1	0	0	0	3
A165	Female	59.2334	No	0	7	3	2	2
A166	Male	49	No	1	1	1	1	3
A167	Female	50.5517	No	5	0	0	0	1
A168	Male	33.473	Yes	40	3	2	1	2
A169	Female	79.9343	No	0	13	8	7	1
A170	Male	40.2738	Yes	12	0	0	0	4
A171	Female	52.9008	No	0	1	1	0	3
A172	Male	46.9268	Yes	5	2	1	1	3
A173	Female	70.6201	No	0	2	2	2	1
A174	Female	60.5722	No	0	3	4	3	3
A175	Female	37.7495	No	3	0	0	0	2
A176	Female	32.6434	No	0	1	3	2	1
A177	Male	64.0274	No	19	6	6	5	3
A178	Male	58.0917	No	8	0	2	2	4
A179	Male	71.7153	No	0	4	4	2	2
A180	Male	22.0698	No	7	0	0	0	2
A181	Female	74.9459	No	0	6	8	7	2
A182	Female	69.2649	No	4	16	7	7	3
A183	Female	29.525	No	3	4	0	0	1
A184	Male	69.0267	No	0	4	3	3	3
A185	Female	77.6537	No	3	6	6	5	2
A186	Female	34.4613	No	4	0	0	0	1
A187	Female	62.6256	No	0	2	2	2	3
A188	Male	56.7447	No	20	0	0	0	4
A189	Female	68.4353	No	0	7	4	3	2
A190	Female	72.3559	No	0	4	7	6	1
A191	Female	37.4702	No	5	0	2	2	3
A192	Female	48.0684	No	0	1	2	1	2
A193	Female	66.6256	No	3	4	4	3	1
A194	Female	87.9535	No	10	6	5	3	2
A195	Female	71.6632	Yes	1	11	12	9	4
A196	Female	81.1773	No	0	2	4	3	3
A197	Female	55.7919	No	1	5	3	3	4
A198	Male	55.7317	No	0	4	4	3	2
A199	Female	38.9678	No	1	6	2	2	3
A200	Male	33.1937	No	13	9	3	3	3
A201	Female	65.1389	No	0	6	5	5	3
